# Supplementary material for: Tailoring Escherichia coli BL21 (DE3) for preferential xylose utilization via metabolic and regulatory engineering
Source: Springer Nature journal article supplement (doi:10.1007/s00253-025-13430-4), 2025-02-28
Supplement: MOESM1 [file 253_2025_13430_MOESM1_ESM.pdf]

## **Applied Microbiology and Biotechnology**

### **Tailoring *Escherichia coli* BL21(DE3) for preferential xylose utilization via metabolic and regulatory engineering**

Eliseo R. Molina-Vázquez, Luis Caspeta, Guillermo Gosset, Alfredo Martínez \*

Departamento de Ingeniería Celular y Biocatálisis, Instituto de Biotecnología, Universidad Nacional Autónoma de México. Av. Universidad 2001, Col. Chamilpa, Cuernavaca, Morelos 62210, México.

\* Corresponding author:

AM: ORCID ID: 0000-0002-4804-6687; alfredo@ibt.unam.mx

Tel.: (+52) 777 3291601

emails

ERM-V: ORCID ID: 0009-0002-4021-7936; eliseo.molina@ibt.unam.mx

LC: ORCID ID: 0000-0003-4622-5179; luis.caspeta@ibt.unam.mx

GG: ORCID ID: 0000-0003-3127-0911; guillermo.gosset@ibt.unam.mx

## Supplementary Information

**Supplementary Table S1**

| Oligonucleótido | Secuencia (5'- 3')                                                | Descripción                                                                                                                                                                                                                                                                                                       |
|-----------------|-------------------------------------------------------------------|-------------------------------------------------------------------------------------------------------------------------------------------------------------------------------------------------------------------------------------------------------------------------------------------------------------------|
| F_don_crr       | TTG CTG GGG ATG GGT CTG GA                                        | Amplify the kanamycin resistance cassette flanked by FRT sequences from the genomic DNA of the strain Keio $\Delta crr$ , generating overhangs with homology to 226 pb upstream and 150 pb downstream <i>crr</i> locus. The amplicon was utilized for gene inactivation using the lambda red system protocol.     |
| R_don_crr       | TTA ACC GAT GCA GTG CAC CG                                        |                                                                                                                                                                                                                                                                                                                   |
| F_don_xylR      | ATG TCG AAA AGC AAT CCG TC                                        | Amplify the kanamycin resistance cassette flanked by FRT sequences from the genomic DNA of the strain Keio $\Delta xylR$ , generating overhangs with homology to 1249 pb upstream and 1014 pb downstream <i>xylR</i> locus. The amplicon was utilized for gene inactivation using the lambda red system protocol. |
| R_don_xylR      | TTG ACT CCC ATA CGA CGA TA                                        |                                                                                                                                                                                                                                                                                                                   |
| F1_xylR         | <u>CAA TTT CAC ACA GGA AAC AGC CAT</u><br>GTT TAC TAA ACG TCA CCG | Amplify the region from 1 to 106 pb of <i>xylR</i> gene, introducing the punctual mutation C91A (indicated in bold) and generating an overhang with homology to the linearized pCL1920 vector (underlined sequence).                                                                                              |
| R1_mutxylR      | CCG ATT GTG ACG CCT TTA AAT ATT CCC<br>CTA CGC CTT                |                                                                                                                                                                                                                                                                                                                   |
| F2_mutxylR      | AAG GCG TAG GGG AAT ATT TAA AGG<br>CGT CAC AAT CGG                | Amplify the region from 71 to 1,201 pb of <i>xylR</i> gene, introducing the punctual mutation C91A (indicated in bold) and generating an overhang with homology to the linearized pCL1920 vector (underlined sequence).                                                                                           |
| R2_XylR         | <u>CCT CTA GAG TCG ACC TGC AGC TAC</u><br>AAC ATG ACC TCG CTA T   |                                                                                                                                                                                                                                                                                                                   |
| F_lin_pCL       | CTG CAG GTC GAC TCT AGA GG                                        | Linearize the pCL1920 vector to facilitate circular polymerase extension cloning.                                                                                                                                                                                                                                 |
| R_lin_pCL       | GGC TGT TTC CTG TGT GAA ATT G                                     |                                                                                                                                                                                                                                                                                                                   |

**Table S1** List of primers utilized in the molecular biology procedures for constructing the strains and plasmids

# Supplementary Figure S1

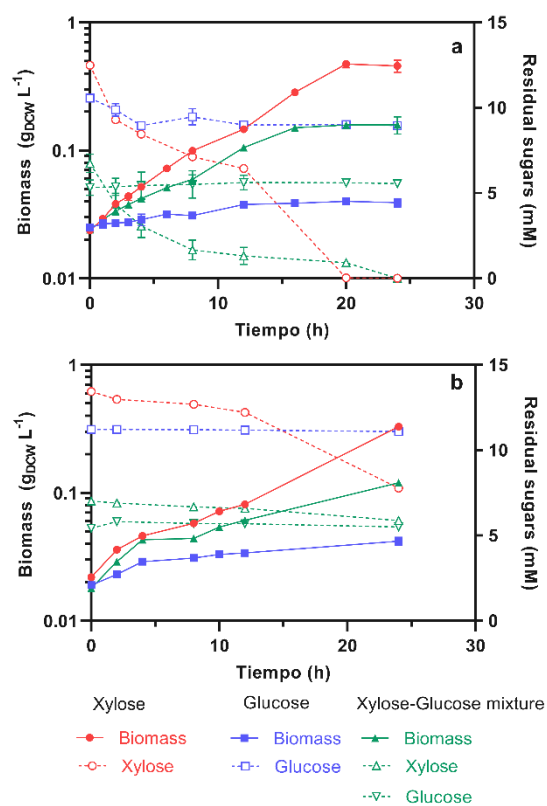

**Figure S1** Growth and residual sugars kinetics of the strains a) ES02 (BL21 DE3  $\Delta glk$ ,  $\Delta manZ$ ,  $\Delta ptsG$ ) and b) ES03 (BL21 DE3  $\Delta glk$ ,  $\Delta manZ$ ,  $\Delta ptsG$ ,  $\Delta crr$ ) in defined M9 medium with 16 mM xylose (circles) or 14 mM glucose (squares), or a mixture (triangles) of 8 mM xylose with 7 mM glucose.

## Supplementary Figure S2

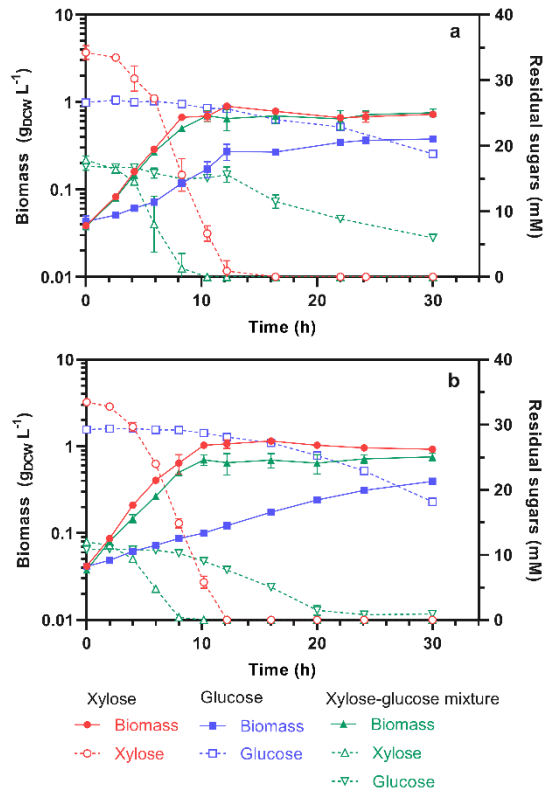

**Figure S2** Growth and residual sugars kinetics of the strains a) ES04 (ES02 *xylR::Km<sup>r</sup>, lacZ::xylR<sup>C91A</sup>-Gm<sup>r</sup>*) and ES05 (ES02  $\Delta$ *xylR*, *lacZ::xylR<sup>C91A</sup>-Gm<sup>r</sup> gatC::Km<sup>r</sup>*) in defined M9 medium with 33 mM xylose (circles) or 28 mM glucose (squares), or a mixture (triangles) of 16.5 mM xylose with 14 mM glucose.

### Supplementary Figure S3

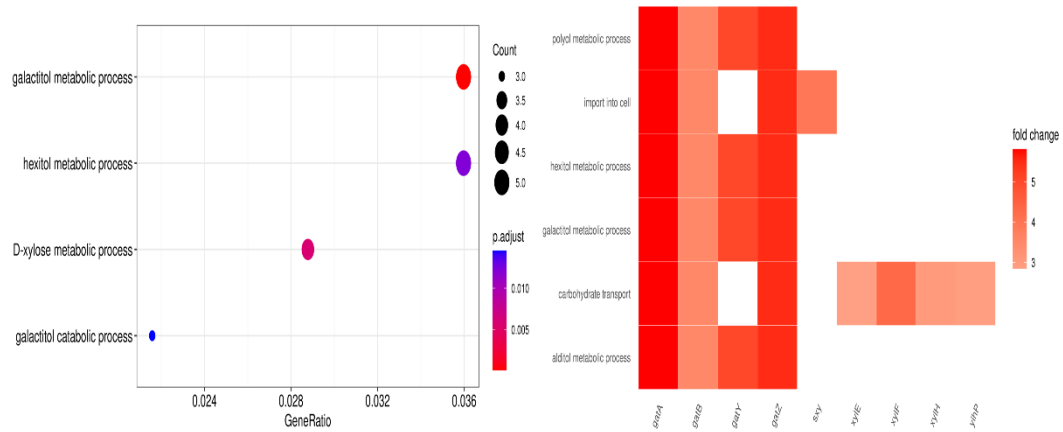

**Figure S3** Dot and heat map resulting from Gene Set Enrichment Analysis (GSEA) from ES04 compared to BL21(DE3) strains cultured in glucose. Differentially expressed genes were selected by calculating an intensity-dependent Z-score as  $z_i = (R_i - \text{mean}(R)) / (\text{sd}(R))$ , where  $z_i$  is the Z-score for each element gene,  $R_i$  is the log-ratio for each element gene, and  $\text{sd}(R)$  is the standard deviation of the log-ratio. Genes with  $|z\text{-score}| > 2$  standard deviations were considered significantly expressed genes. The analysis was performed by ClusterProfiler package, which was used to perform gene enrichment analysis (GEA), and pValue and qValue were adjusted by the HB method with a cutoff value  $< 0.05$ .

**Supplementary Figure S4**

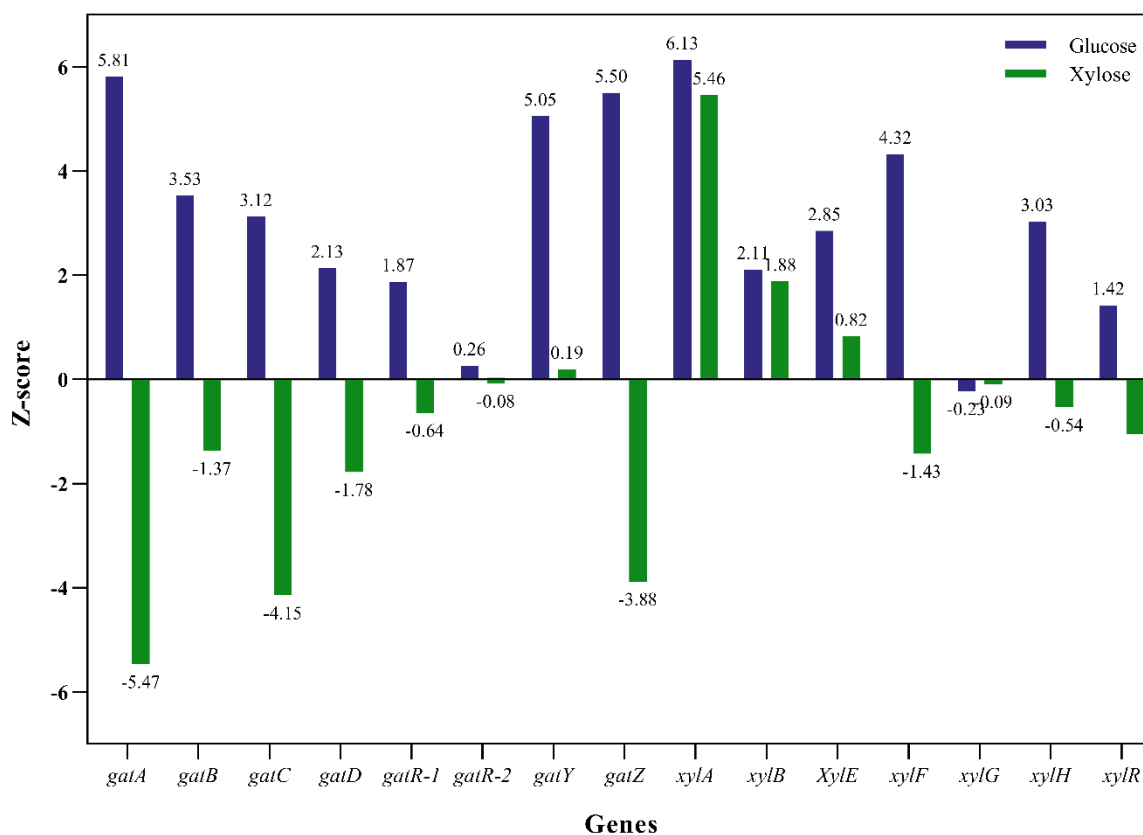

**Figure S4** Differentially expressed genes of ES04 compared to BL21(DE3) with xylose and glucose. Z-score as  $z_i = (R_i - \text{mean}(R)) / (\text{sd}(R))$ , where  $z_i$  is the z score for each element gene,  $R_i$  is the logratio for each element gene, and  $\text{sd}(R)$  is the standard deviation of the log ratio

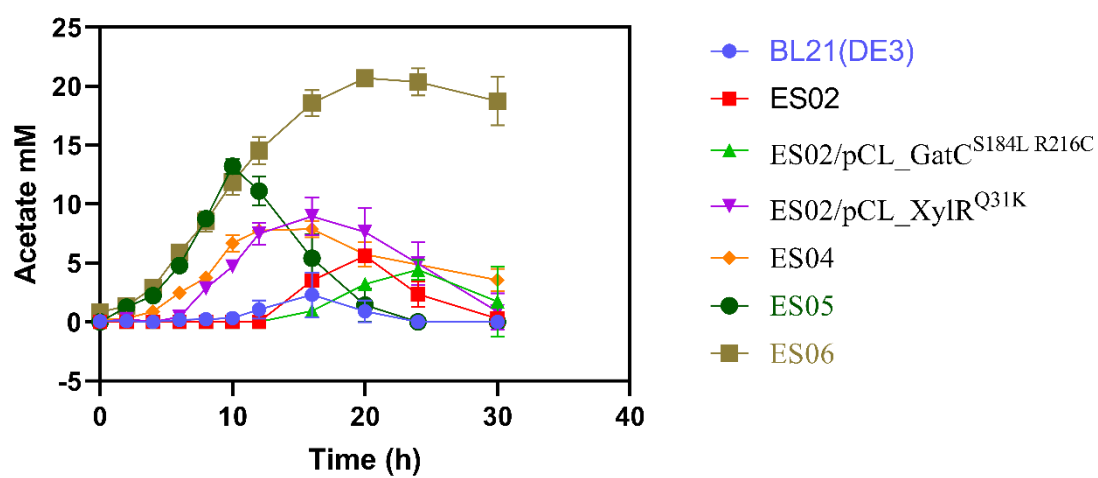

**Figure S5** Acetate production kinetics of the different *E. coli* strains evaluated in this study using 33 mM xylose as carbon source.
